# Supplementary material for: Construction of 3D metal–organic frameworks bearing heteropolyoxometalate units and multi-azole molecules and exploration of their photocatalytic activities
Source: Royal Society of Chemistry journal article supplement (doi:10.1039/c7ra05210c), 2017-01-01
Supplement: c7ra05210c1.pdf [file c7ra05210c1.pdf]

# Construction of 3D Metal-Organic Frameworks Bearing Heteropolyoxometalates Units and Multi-azole Molecules and Exploration of Their Photocatalytic Activities

Chunhua Gong, Xianghua Zeng, Li Xin, Junyong Zhang\* and Jingli Xie

<sup>a</sup>College of Biological, Chemical Science and Engineering, Jiaying University, Jiaying 314001, P. R. China E-mail: zhangjy@mail.zjxu.edu.cn

<sup>b</sup>State Key Laboratory of Structural Chemistry, Fujian Institute of Research on the Structure of Matter, Chinese Academy of Sciences, Fuzhou 350002, P. R. China

**Table S1** Selected bond lengths and angles for compounds **1** and **2**.

| Compound 1      |            |                |            |
|-----------------|------------|----------------|------------|
| Cu1–N1          | 2.108(3)   | Cu2–O3W        | 2.267(3)   |
| Cu1–N14         | 1.998(3)   | Cu2–O3W#5      | 1.915(3)   |
| Cu1–O1          | 2.307(3)   | Cu3–N4         | 2.137(3)   |
| Cu2–Cu2#5       | 3.0364(10) | Cu3–N7         | 1.969(3)   |
| Cu2–N3          | 1.955(3)   | Cu3–N8         | 2.113(3)   |
| Cu2–N9          | 2.039(4)   | Cu3–O3W        | 1.919(3)   |
| Cu2–O1W         | 2.230(3)   | Cu3–O4W        | 2.214(4)   |
| Cu2–O2W         | 2.305(10)  |                |            |
| N1–Cu1–O1#1     | 96.74(11)  | N9#5–Cu2–Cu2#5 | 103.41(9)  |
| N1–Cu1–O1       | 83.26(11)  | N9#5–Cu2–O3W   | 109.60(12) |
| N14#2–Cu1–O1    | 90.37(11)  | N9#5–Cu2–O1W   | 160.33(14) |
| N14#3–Cu1–O1    | 89.63(11)  | N9#5–Cu2–O2W   | 86.0(3)    |
| N14#3–Cu1–N1    | 88.97(11)  | O1W–Cu2–Cu2#5  | 90.83(9)   |
| N14#2–Cu1–N1    | 91.03(11)  | O1W–Cu2–O3W    | 90.02(12)  |
| N3–Cu2–Cu2#5    | 122.51(9)  | O1W–Cu2–O2W    | 74.3(3)    |
| N3–Cu2–O3W      | 83.47(11)  | O2W–Cu2–Cu2#5  | 138.8(2)   |
| N3–Cu–2N9#5     | 97.93(13)  | O3W–Cu3–N4     | 86.41(10)  |
| N3–Cu2–O1W      | 85.35(12)  | O3W–Cu3–O4W    | 91.57(12)  |
| N3–Cu2–O2W      | 94.9(3)    | O3W–Cu3–N7     | 172.00(12) |
| O3W–Cu2–Cu2#5   | 39.11(6)   | O3W–Cu3–N8     | 87.98(11)  |
| O3W#5–Cu2–Cu2#5 | 48.15(8)   | N4–Cu3–O4W     | 94.81(13)  |
| O3W#5–Cu2–N3    | 170.13(11) | N7–Cu3–N4      | 91.20(12)  |
| O3W#5–Cu2–O3W   | 87.25(10)  | N7–Cu3–O4W     | 96.24(13)  |
| O3W#5–Cu2–N9#5  | 88.35(11)  | N7–Cu3–N8      | 92.23(12)  |
| O3W#5–Cu2–O1W   | 91.29(10)  | N8–Cu3–N4      | 163.49(12) |
| O3W–Cu2–O2W     | 164.4(3)   | N8–Cu3–O4W     | 100.86(13) |

| O3W#5–Cu2–O2W                                                                          |           | 93.1(2)     |           |
|----------------------------------------------------------------------------------------|-----------|-------------|-----------|
| Symmetry codes : #1 1–x, 2–y, –z; #2 1–x, 1–y, 1–z; #3 1–x, 1–y, –z; #5 2–x, 2–y, 1–z. |           |             |           |
| Compound 2                                                                             |           |             |           |
| Cu1–N8                                                                                 | 1.99(2)   | Cu2–O2W     | 1.95(3)   |
| Cu1–N10                                                                                | 2.00(2)   | Cu2–N12     | 1.96(2)   |
| Cu1–N2                                                                                 | 2.06(2)   | Cu2–N5      | 2.00(2)   |
| Cu1–N9                                                                                 | 2.10(2)   | Cu2–O4W     | 2.05(3)   |
| Cu1–O1W                                                                                | 2.367(18) | Cu2–O3W     | 2.19(3)   |
| N8–Cu1–N10                                                                             | 176.6(9)  | O2W–Cu2–N12 | 171.5(11) |
| N8–Cu1–N2                                                                              | 93.9(9)   | O2W–Cu2–N5  | 90.5(11)  |
| N10–Cu1–N2                                                                             | 89.3(9)   | N12–Cu2–N5  | 96.2(9)   |
| N8–Cu1–N9                                                                              | 88.0(9)   | O2W–Cu2–O4W | 87.0(12)  |
| N10–Cu1–N9                                                                             | 88.7(9)   | N12–Cu2–O4W | 84.7(10)  |
| N2–Cu1–N9                                                                              | 172.6(9)  | N5–Cu2–O4W  | 153.2(11) |
| N8–Cu1–O1W                                                                             | 87.1(8)   | O2W–Cu2–O3W | 87.5(12)  |
| N10–Cu1–O1W                                                                            | 93.7(8)   | N12–Cu2–O3W | 94.8(10)  |
| N2–Cu1–O1W                                                                             | 97.6(8)   | N5–Cu2–O3W  | 112.3(10) |
| N9–Cu1–O1W                                                                             | 89.6(8)   | O4W–Cu2–O3W | 94.3(10)  |

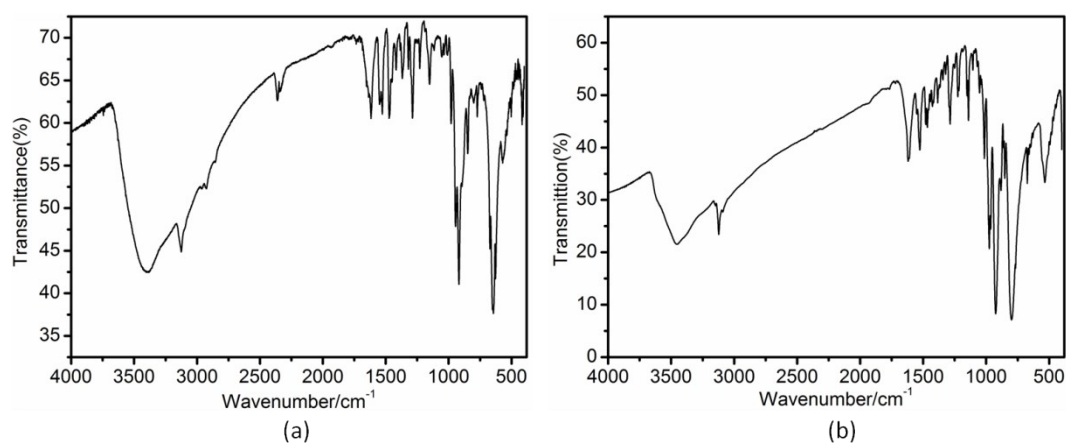

**Fig. S1** The IR spectra of compounds **1** (a) and **2** (b).

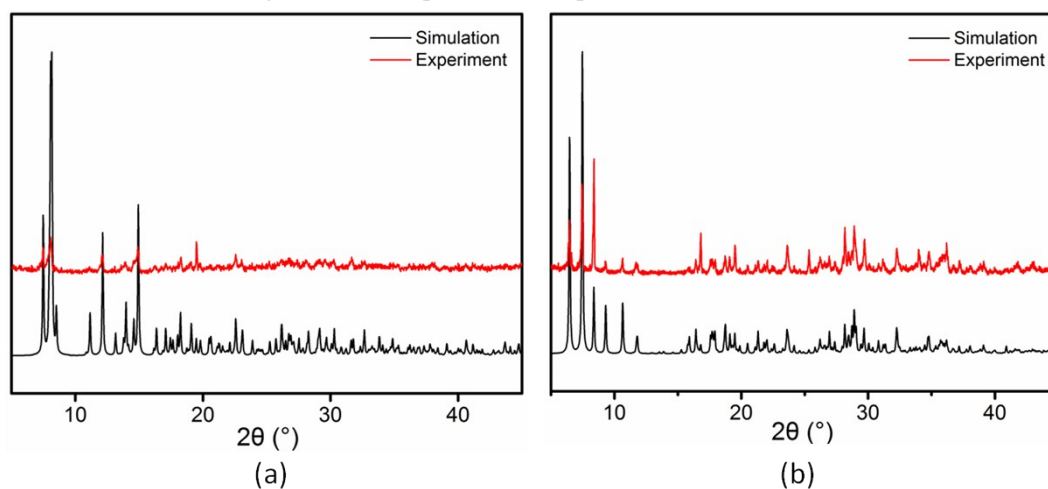

**Fig. S2** The Powder X–ray diffraction of compounds **1** (a) and **2** (b)

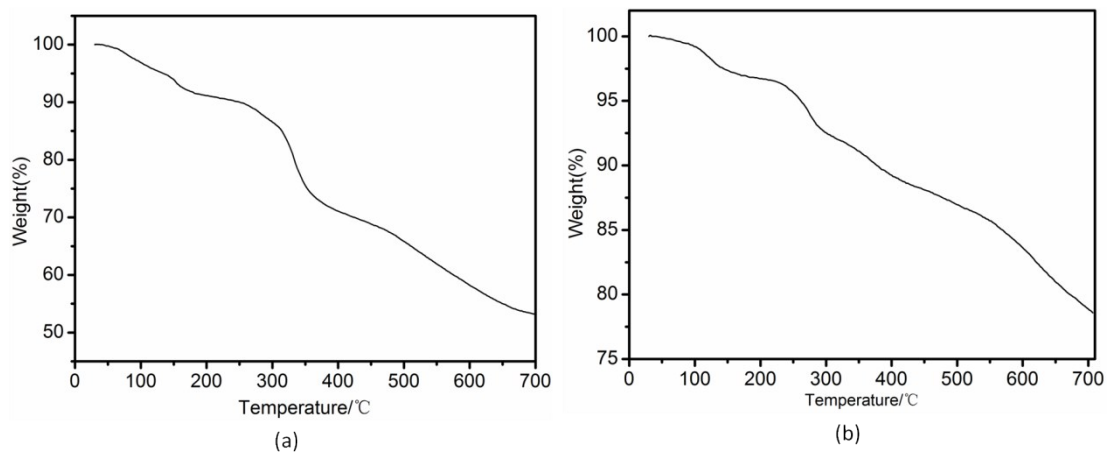

**Fig. S3** The TG curves of compounds **1** (a) and **2** (b).

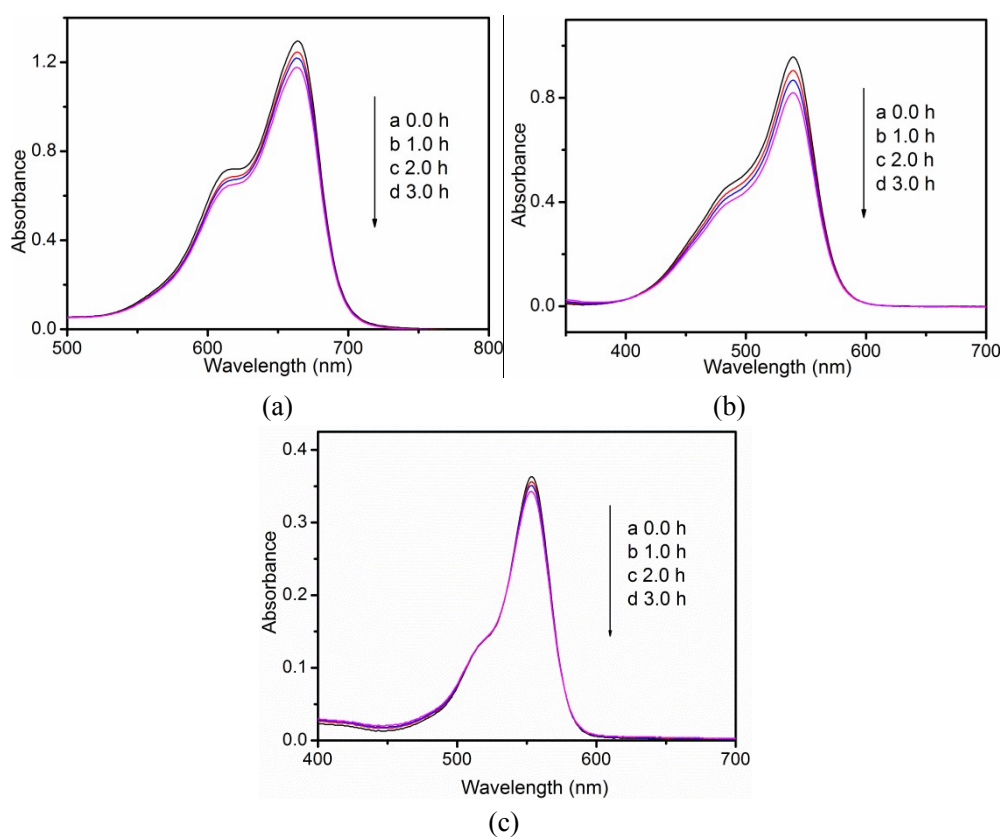

**Fig. S4** The blank experiments for the photocatalytic degradation of MB (a), PH(b) and RhB (c) against irradiation time (h) in absence of **1** and **2**, respectively.

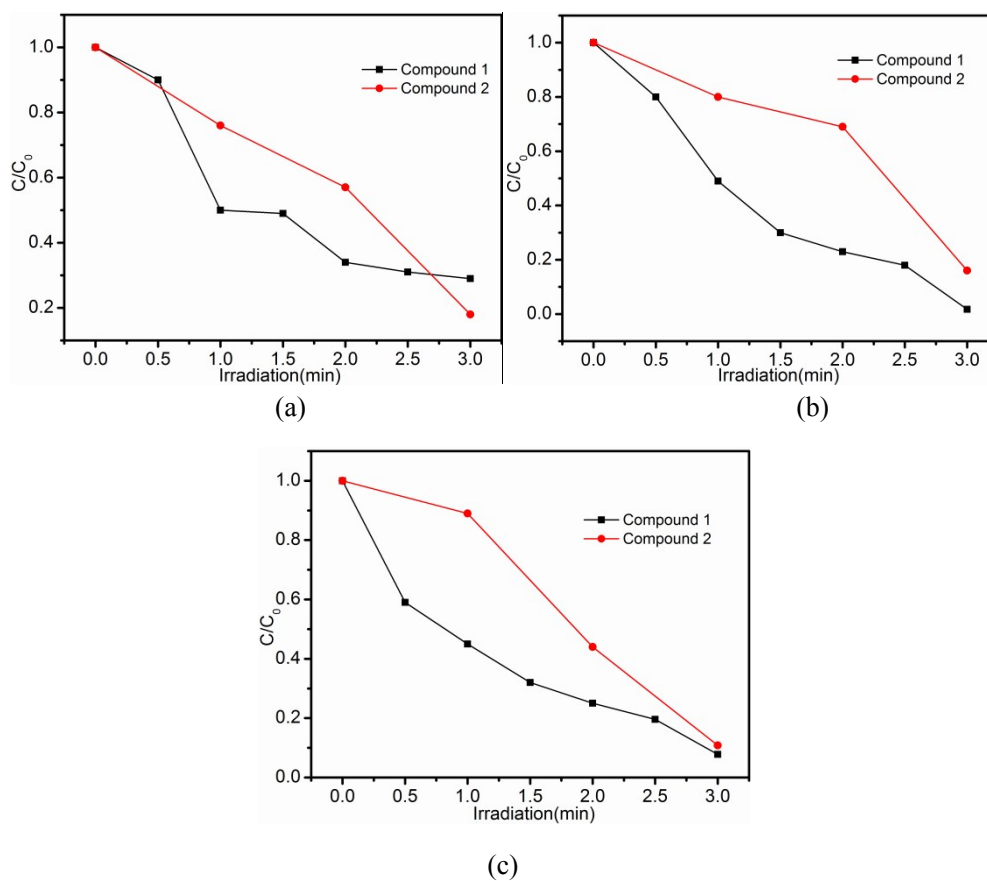

**Fig. S5** Plots of the concentration ratios of MB (a), PH(b) and RhB (c) against irradiation time (h) in the presence of **1** and **2**, respectively.
